# Supplementary material for: High-grade serous tubo-ovarian cancer refined with single-cell RNA sequencing: specific cell subtypes influence survival and determine molecular subtype classification
Source: PubMed Central journal article supplement (PMC8268616; doi:10.1186/s13073-021-00922-x), 2021-07-09
Supplement: 13073_2021_922_MOESM3_ESM.pdf [file 13073_2021_922_MOESM3_ESM.pdf]

# Fig. S1

## A

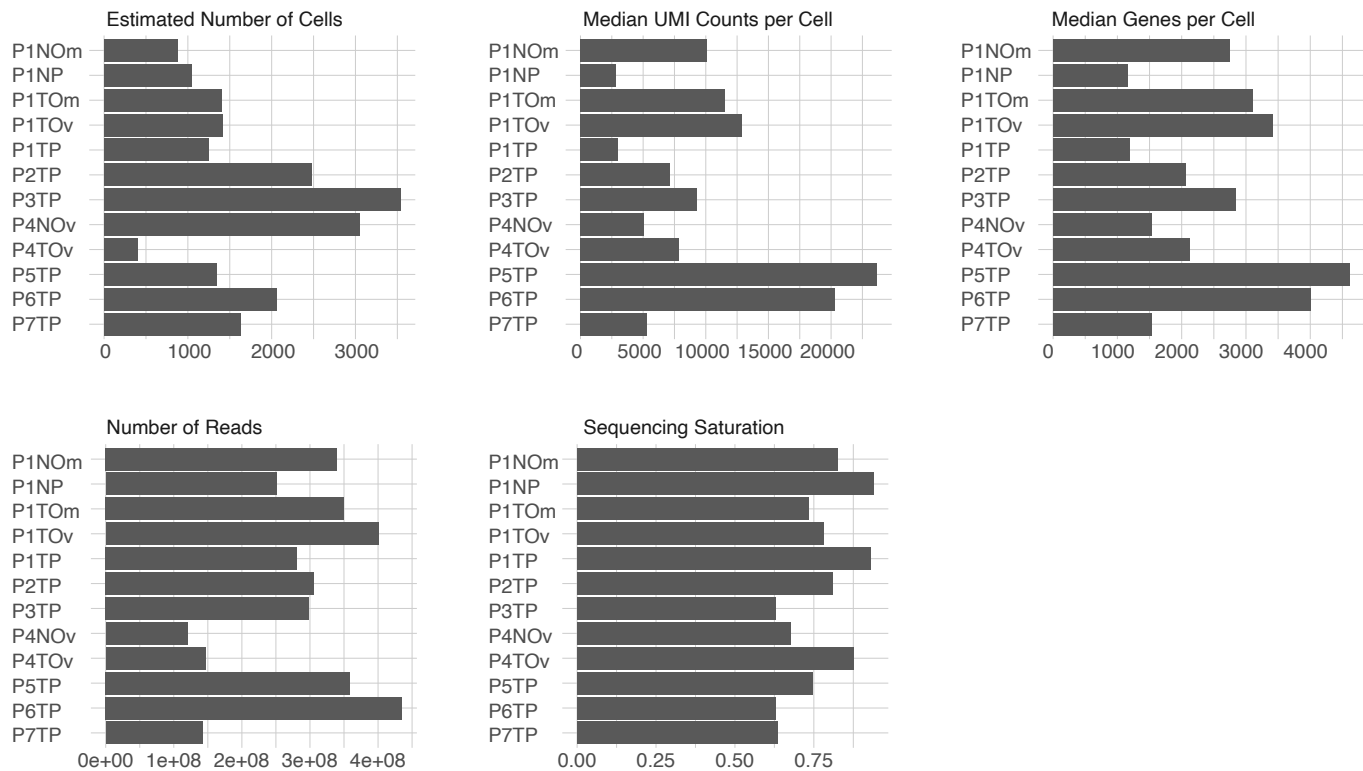

## B

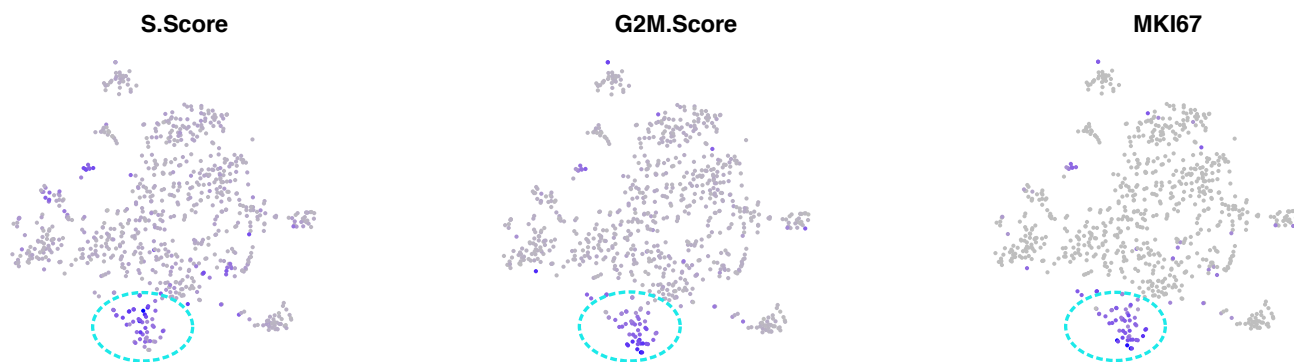

## C Subclustering without cell cycle regression

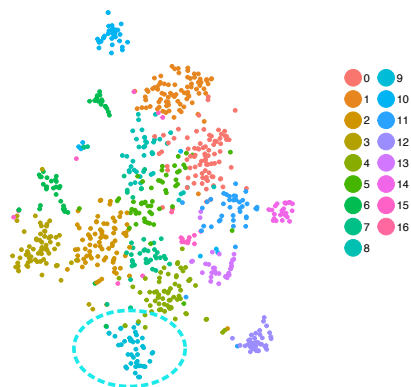

## D Initial phenotypes

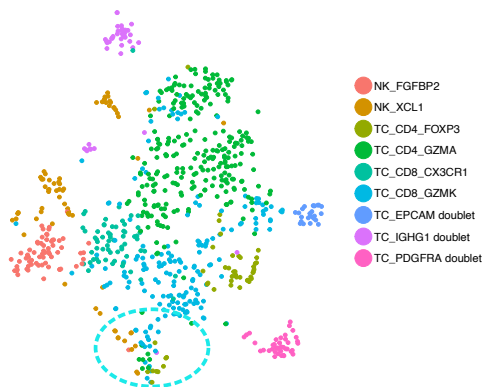

## E T cells, proliferative subcluster

Pipeline without regressing out cell cycling genes

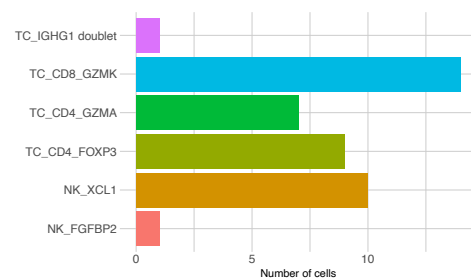

## F

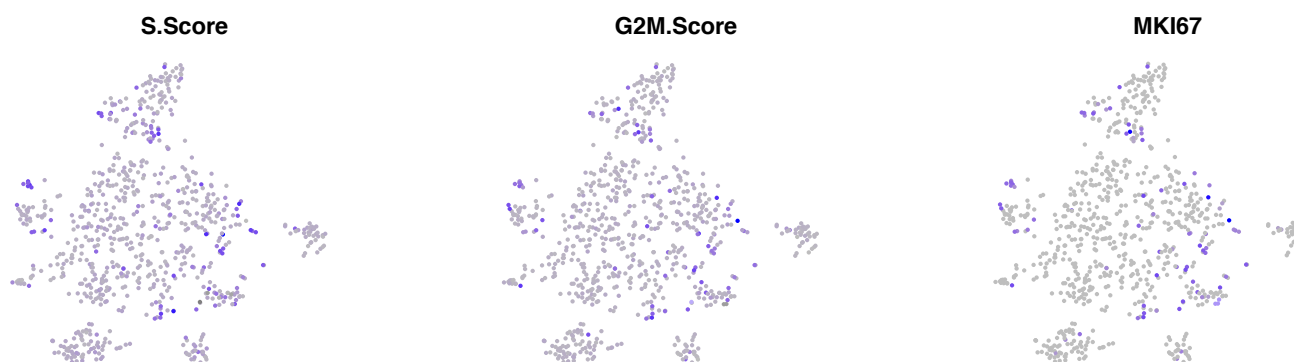

**Fig. S1 | Quality control and regression for cycling genes.** **A**, Overview of the single-cell sequencing metrics across the different samples including the number of reads, the number of cells, average detected genes per cell, average UMIs per cell, sequencing saturation. **B**, Clustering of T cells and Natural Killer (NK) cells without regressing for cell cycle scores. t-SNE showing S phase score, G2M phase score and MKI67 expression in a proliferative cluster as highlighted by a blue circle. **C**, t-SNE visualising the new subclusters obtained without regressing for cell cycle scores. **D**, t-SNE visualising the new subclusters obtained without regressing for cell cycle scores but colour-coded for the subclusters obtained when regressing out cell cycle. **E**, Histogram showing the different T cell and NK cell subtypes in the proliferative subcluster. **F**, t-SNE of T cell subclusters after regressing out cell cycle scores, showing S phase score, G2M phase score and MKI67 expression. No distinct proliferative cluster was found.

# Fig. S2

## A

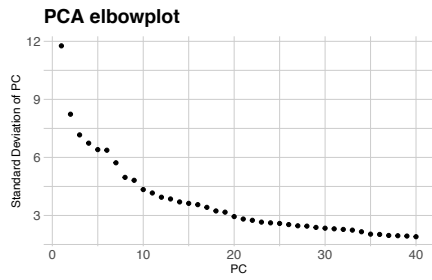

## B

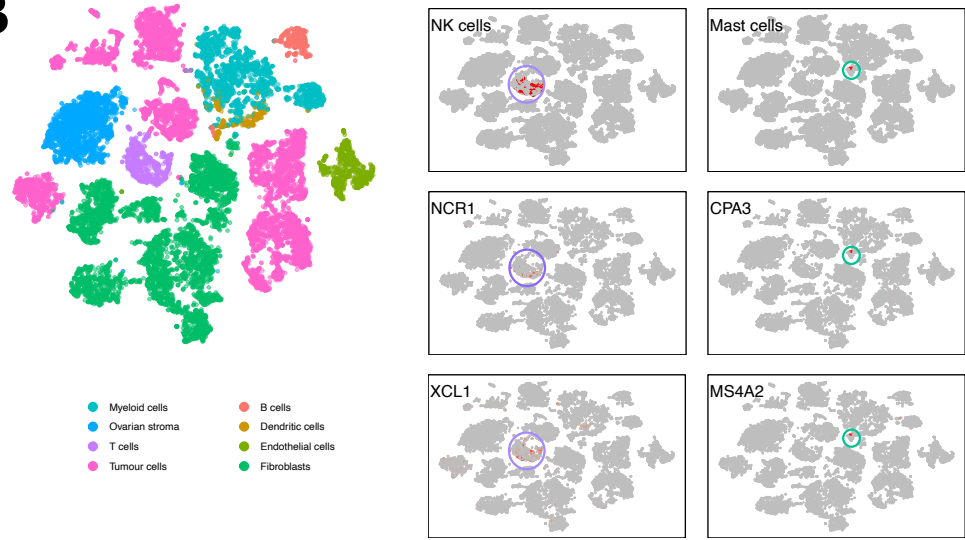

## C

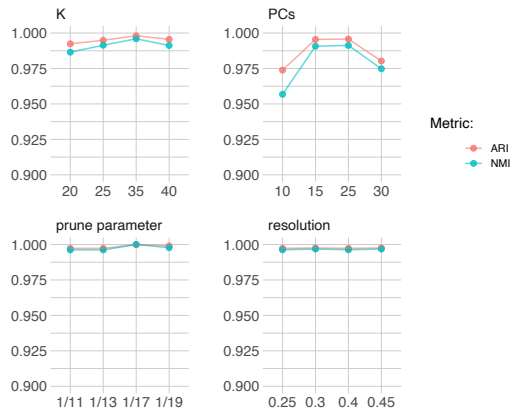

## D

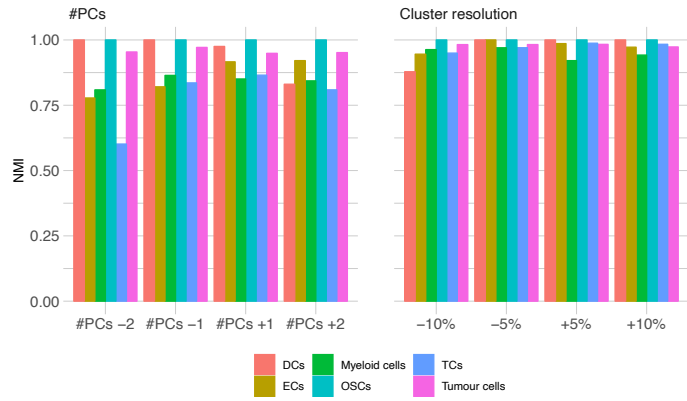

## E

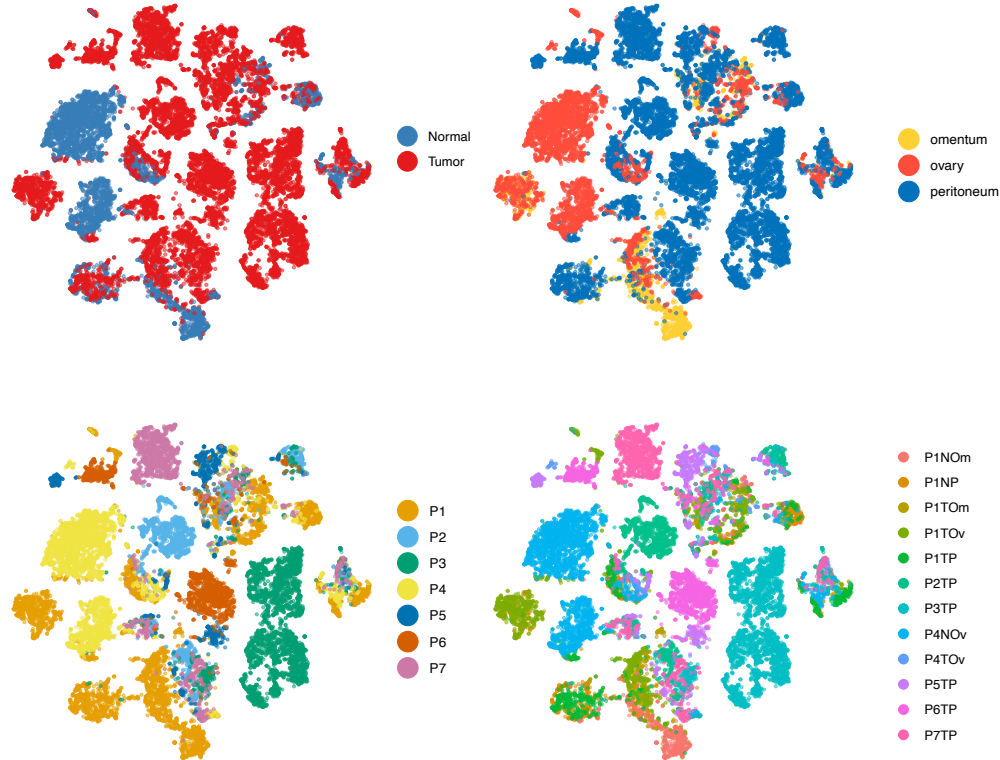

**Fig. S2 | Major cell type clustering.** **A**, Elbow plot analysis of principle components (PC) variance for subclustering in major cell types based on 2,766 variable genes. The curve starts to flatten around 20 PC, which was chosen as cut-off. **B**, t-SNE visualisation of the major cell types indicating the co-clustering of Natural Killers cells (*NCRI*, *XCLI*) and MAST cells (*CPA3*, *MS4A2*) with T cells and myeloid cells respectively. **C**, Robustness of cell type clustering using either lower or higher resolution, K, prune value and number of PCs. Shown is the Normalised Mutual Information (NMI)[45] and the Adjusted Rand Index (ARI)[46], between clusters of the major cell types that were generated using K of 30, the calculated number of informative PCs being 20, a resolution of 0.35 as well as a prune value of 1/15 and variations thereof. **D**, Robustness of cell subtype clustering using either lower or higher resolution or fewer or more PCs. Shown is the NMI between subclusters for each of the major cell types that were generated using the resolution and number of PCs as indicated in the manuscript (Additional file 8: Table S6) and subclusters of the same cells generated at 5% or 10% higher or lower resolution or at one or two PCs less or more. The results for fibroblasts are not shown as we used CCA-aligned subclusters. Likewise, no NMI was calculated for B cells as we deliberately chose to divide B cells in 2 main subgroups. **E**, t-SNE visualisation of all cells colour-coded for tissue specificity (normal, tumour), sampling site (omentum, ovary, peritoneum), patient (P1-P7) and sample (Sample\_ID).

# Fig. S3

## Myeloid cells

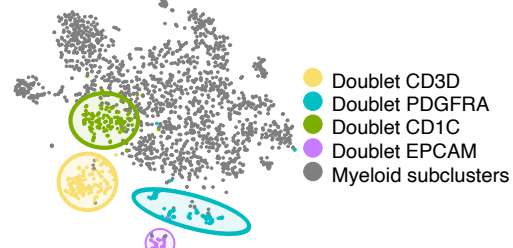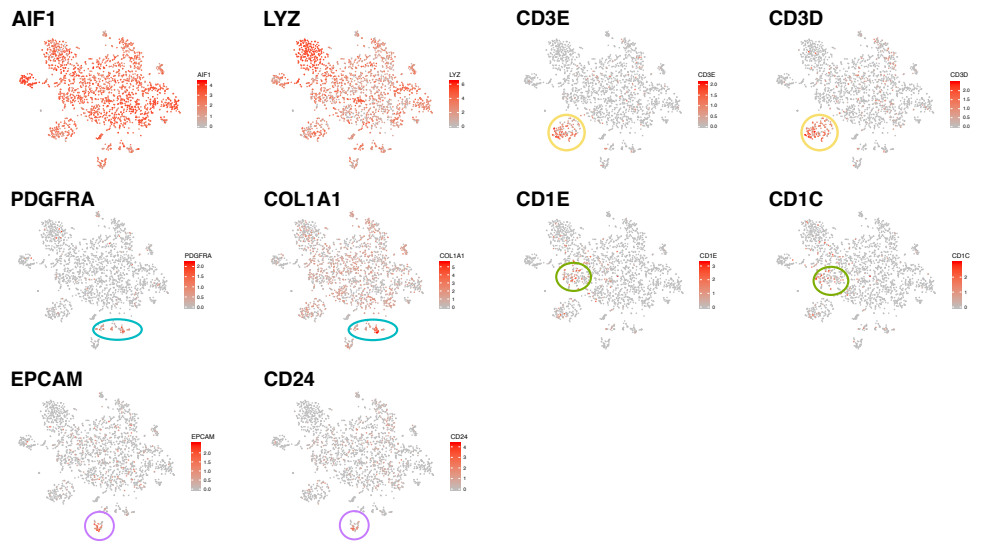

## Endothelial cells

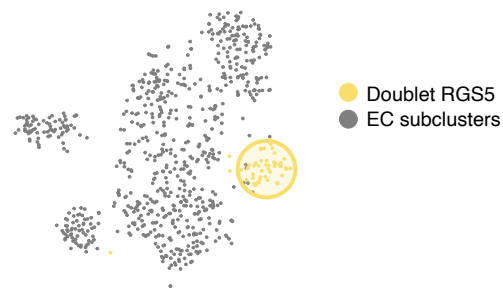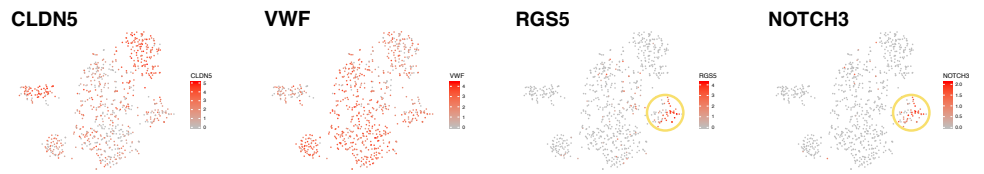

## Fibroblasts

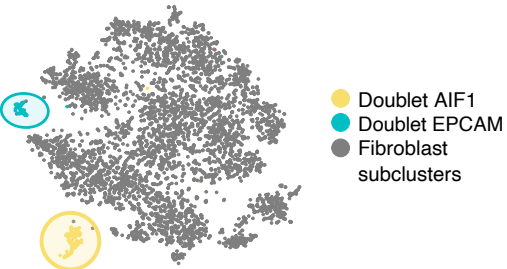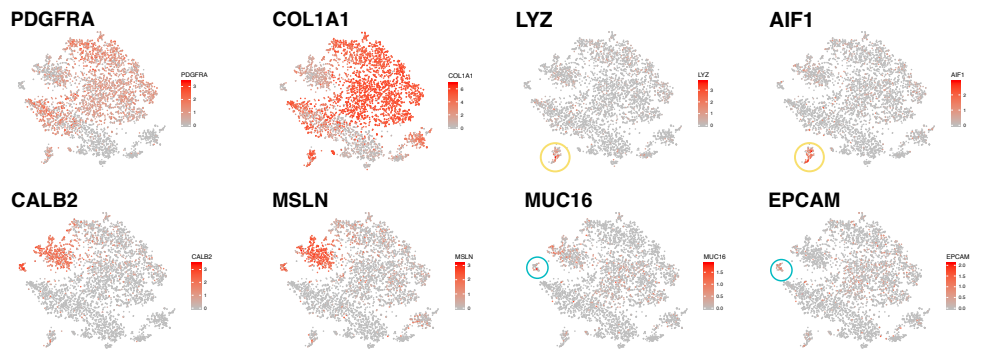

## Tumour cells

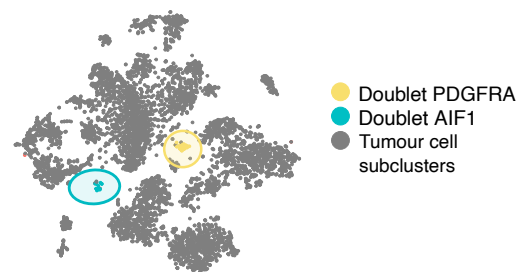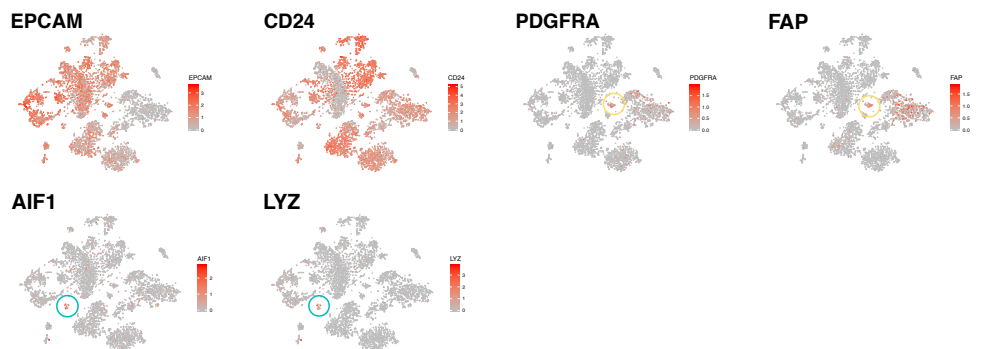

## T cells

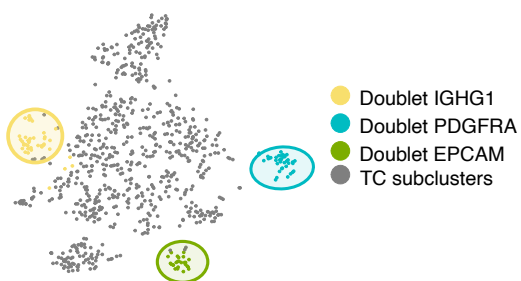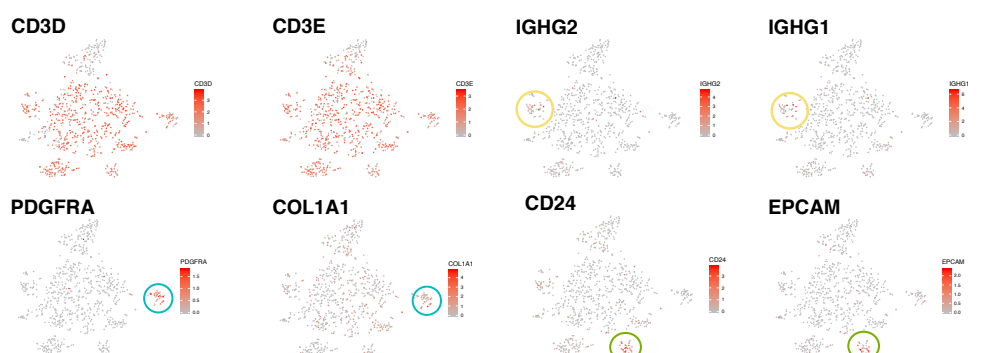

**Fig. S3 | Detection of Doublet subclusters.** t-SNE visualisation and annotation of the doublet subclusters (left) as well as the co-expression of meta genes from different major cell types (right) identified across myeloid cells, endothelial cells, fibroblasts, tumour cells and T cells. The doublet subclusters contained a combination of T cells (*CD3D*, *CD3E*), myeloid cells (*AIF1*, *LYZ*), dendritic cells (*CD1C*, *CD1E*), tumour cells (*EPCAM*, *CD24*), endothelial cells (*VWF*, *CLDN5*), fibroblasts (*PDGFRA*, *COL1A1*), pericytes (*RGS5*, *NOTCH3*), mesothelial cells (*CALB2*, *MSLN*) or B cells (*IGHG2*, *IGHG1*).



**Fig. S4 | Tissue-specific subclusters.** **A**, t-SNE visualisation of dendritic cells (up) and myeloid cells (down) colour-coded for subclusters, patient, sample and sampling site (ovary, omentum, peritoneum). Langerhans-like dendritic cells (DC\_CD207) and lipid-associated macrophages (M\_MMP9) were enriched in the omentum as highlighted by a blue circle. **B**, Violin plots of marker gene expression for Langerhans-like dendritic cells (*CD1A*, *CD207*, *FCGFB*) and lipid-associated macrophages (*TREM2*, *CD36*, *FABP4*). **C**, Heatmap showing metabolic activity for dendritic (left) and myeloid cells (right). **D**, t-SNE visualisation of ovarian stromal cells colour-coded for subclusters, sampling site (ovary, omentum, peritoneum), tissue specificity (normal, tumour), patient of origin and sample. Granulosa cells (OSC\_STAR) and endometrial cells (OSC\_LEFTY2) were only found in non-affected ovarian tissue of patient 4. **E**, Heatmap showing metabolic activity for ovarian stroma cells. **F**, t-SNE visualisation of marker gene expression in ovarian stromal cells.



# Fig. S5

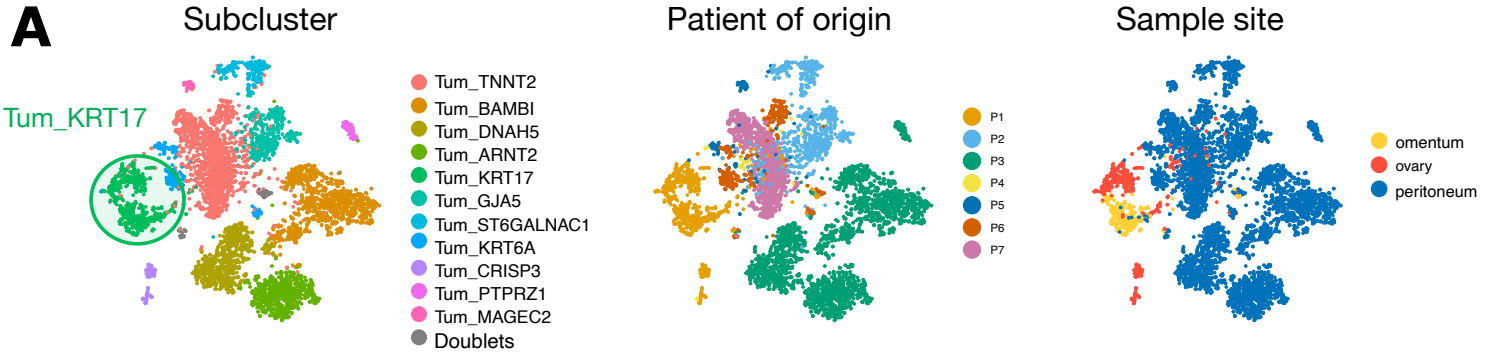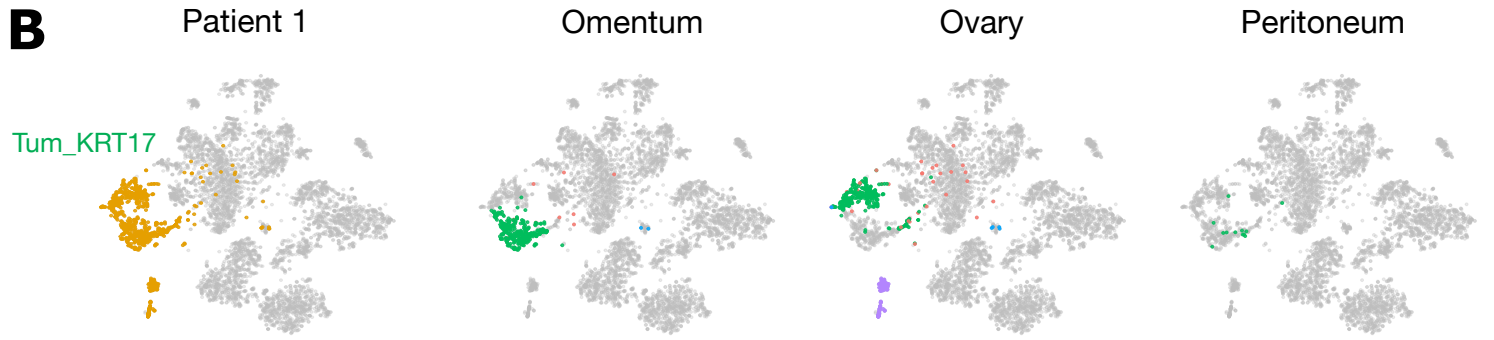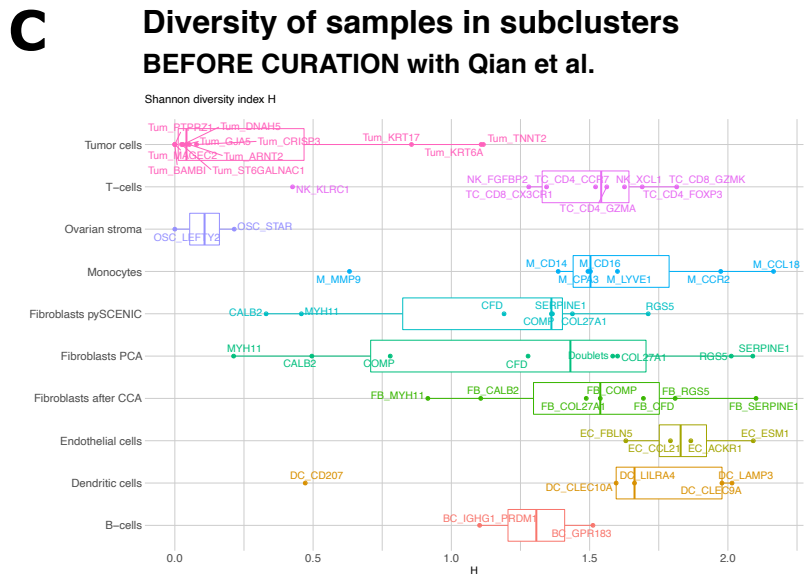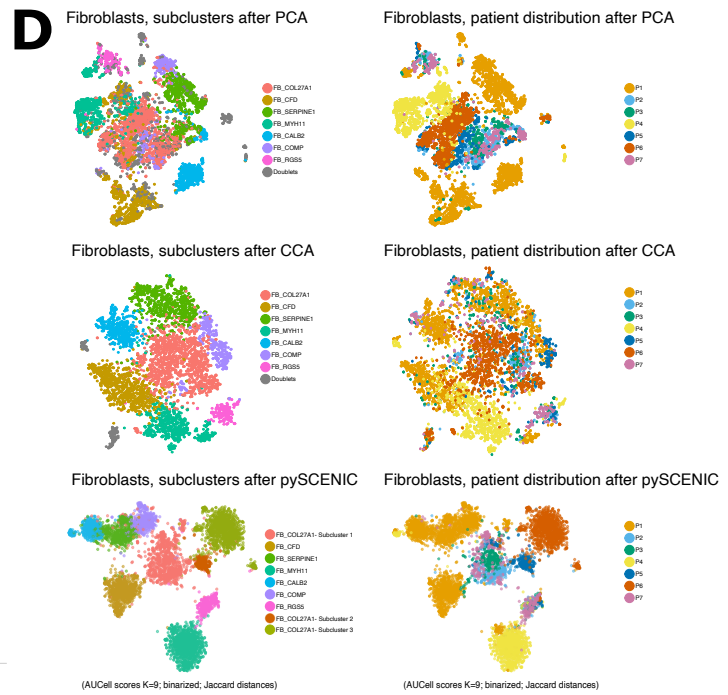

## AFTER CURATION with Qian et al.

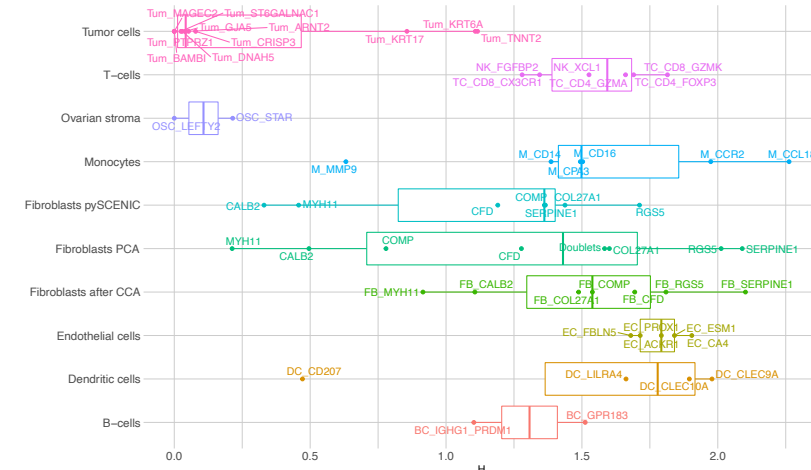

**Fig. S5 | Patient-specificity across the cell subclusters.** **A**, t-SNE visualisation of cancer cell subclusters colour-coded for patient of origin, sampling site (omentum, ovary, peritoneum) and sample\_ID. **B**, Zoom-in on the cancer cell subclusters originating from patient 1 as well as their distribution across the different sampling sites. **C**, Shannon indices for cell subclusters scoring sample diversity. A low Shannon index score indicates dominance of a certain sample in the subcluster while a high score indicates a more even distribution of samples/patients in the subclusters. For fibroblasts, 3 Shannon indices were visualised based on the 3 different alignments used for clustering (PCA, CCA and pySCENIC). **D**, t-SNE plot visualising the effect of the 3 different alignment methods on fibroblasts subclustering and patient-specificity.

# Fig. S6

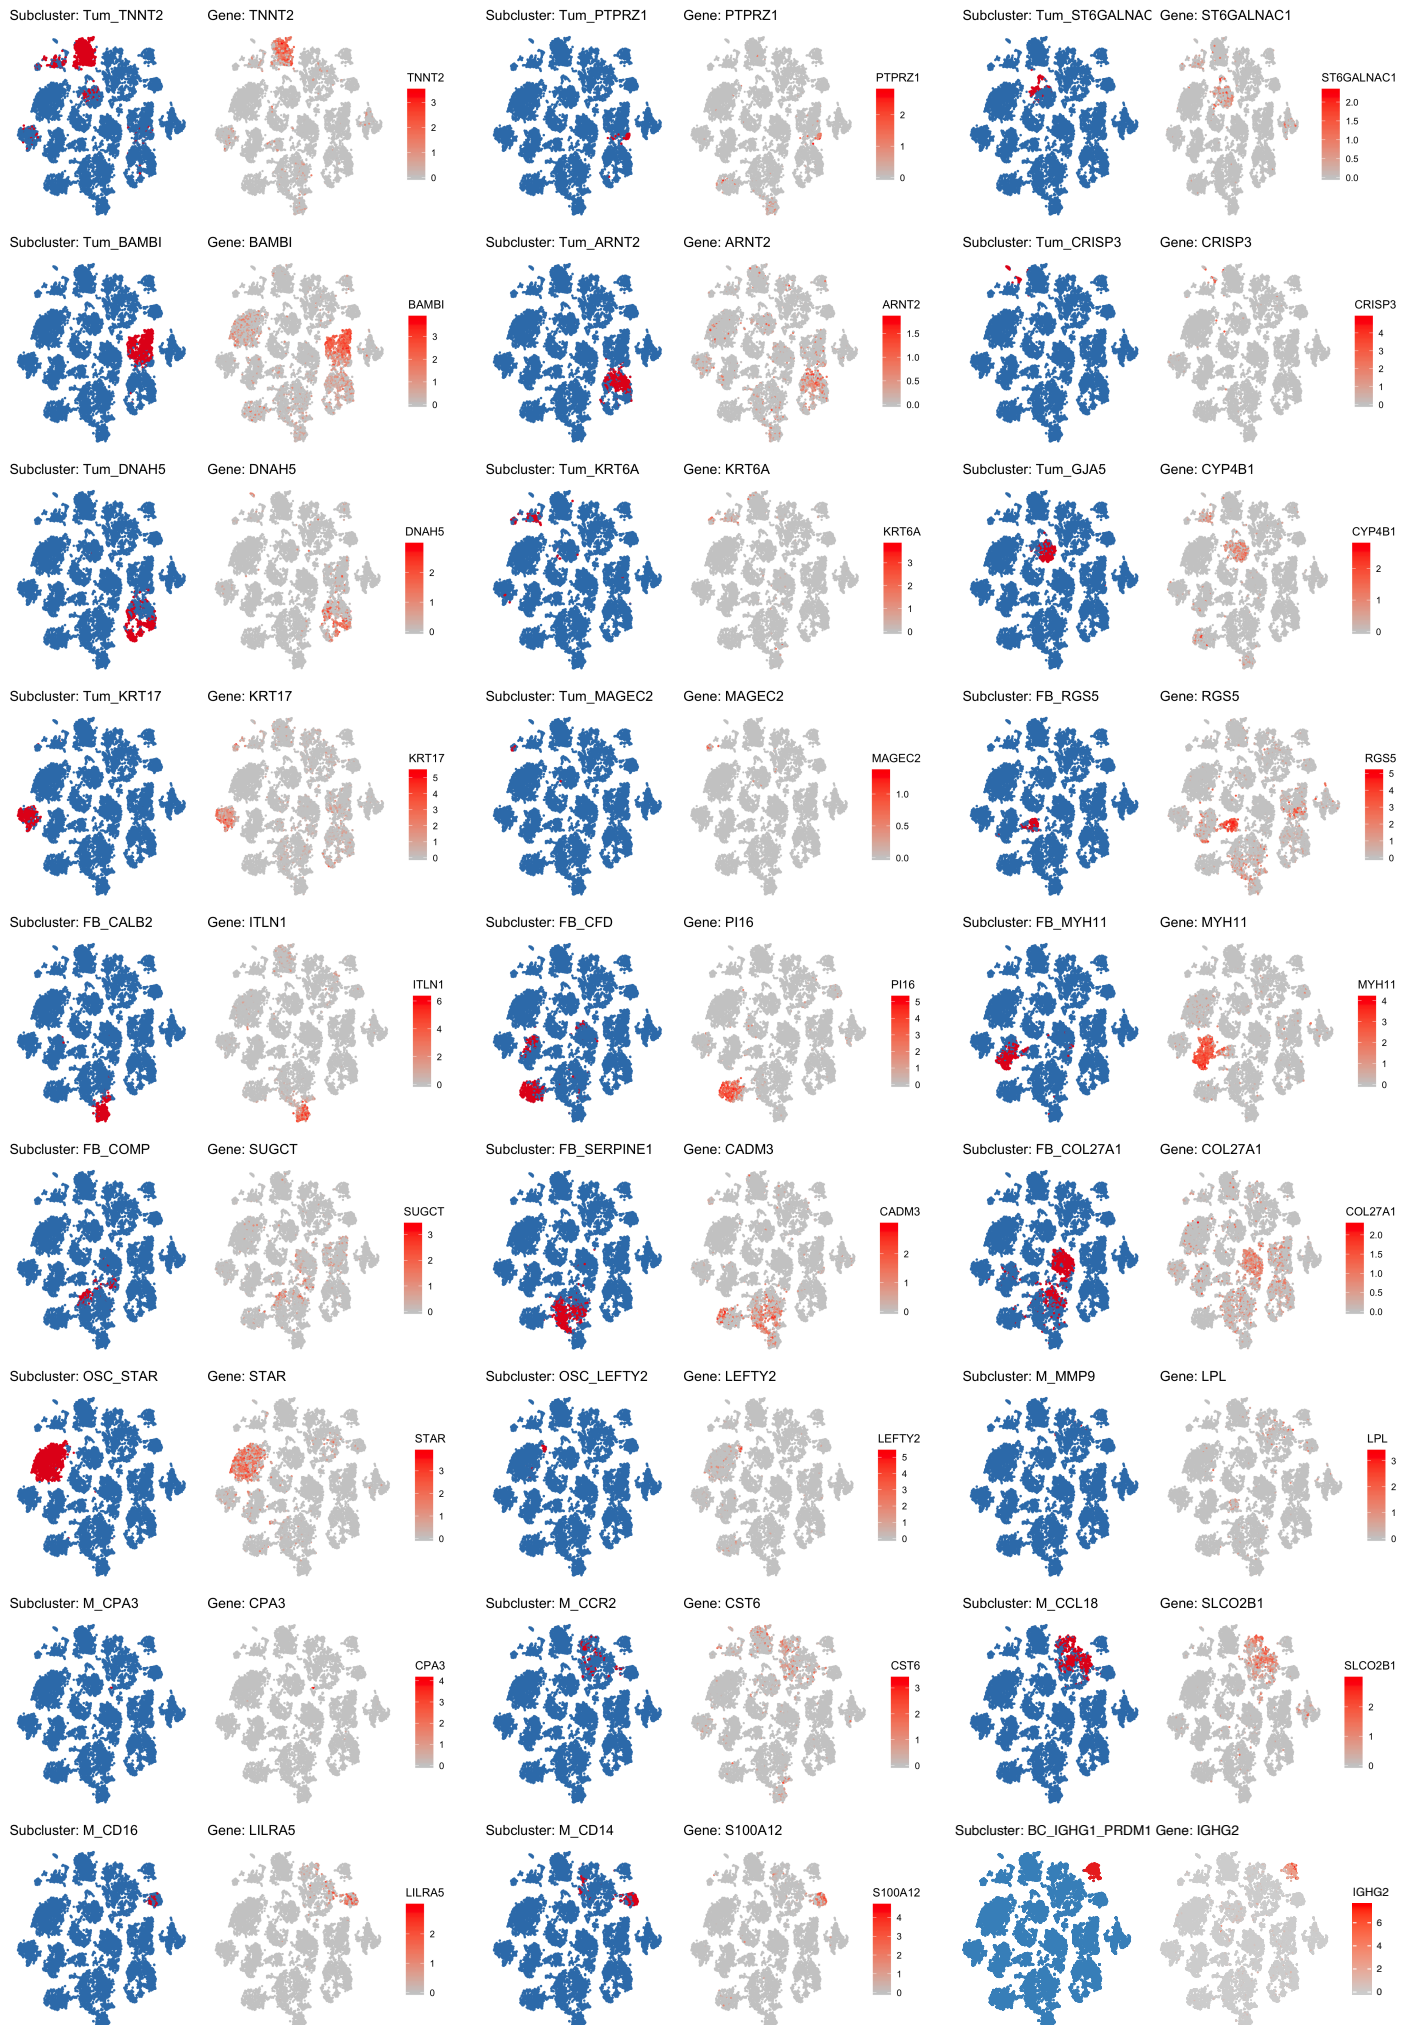

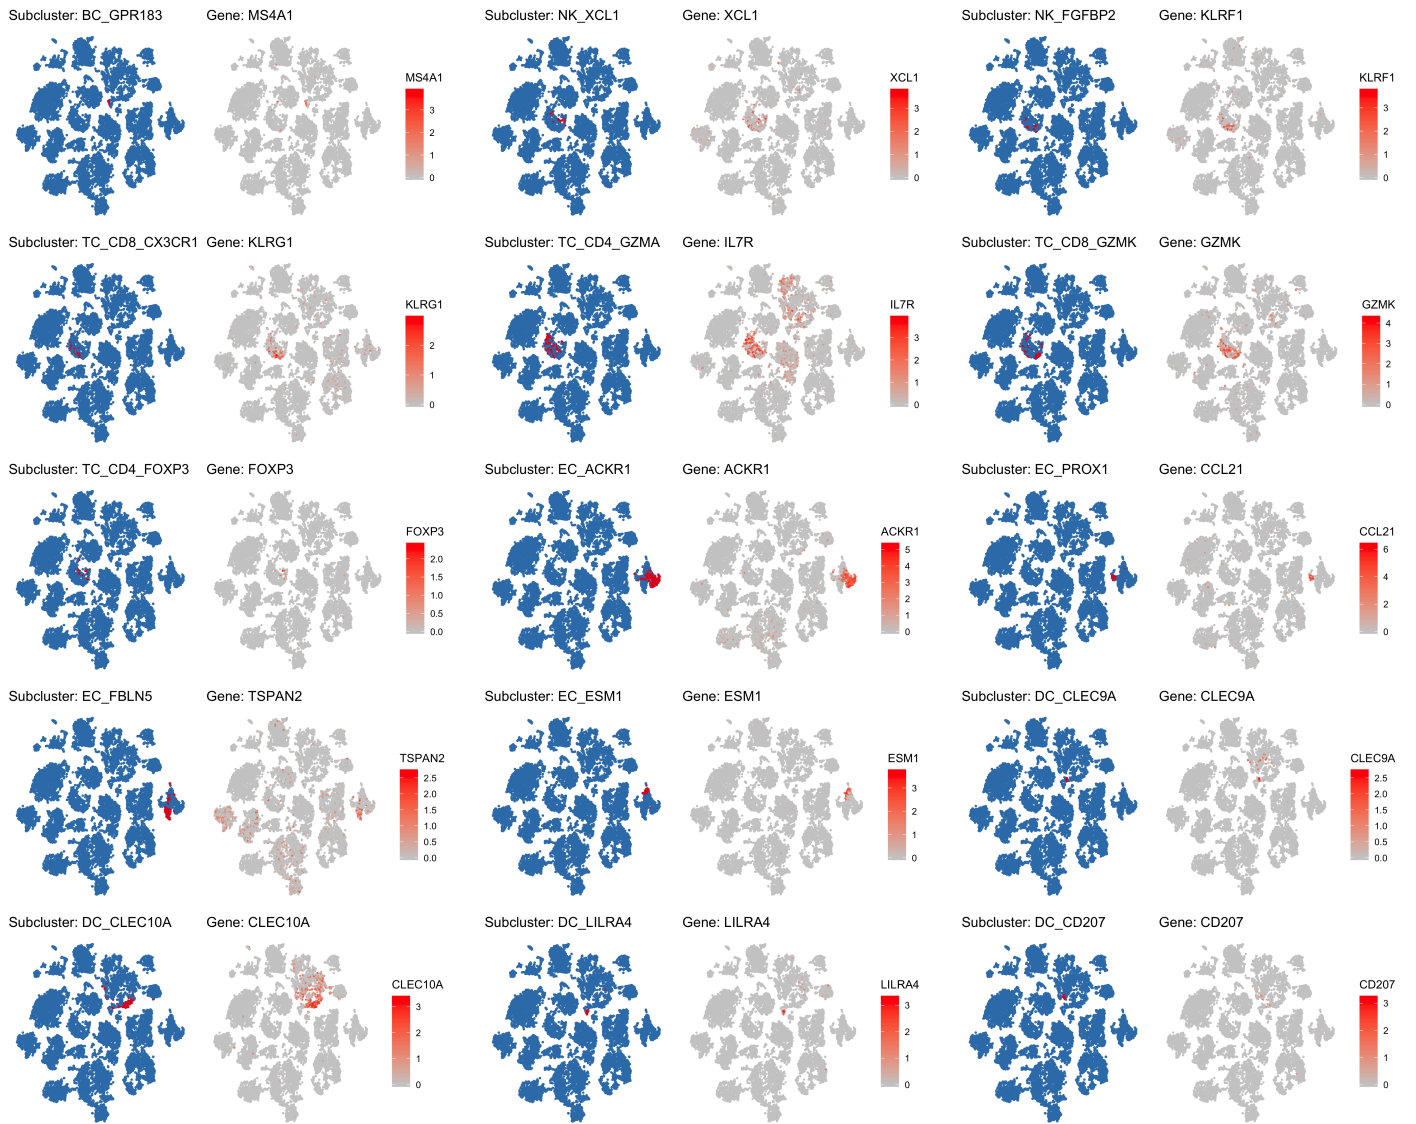

**Fig. S6 | Specificity of the 809 transcriptomic markers (TMs) defining the different subclusters (n=42/43).** t-SNE visualisation of all 18,403 cells with colour-code indicating all cells belonging to one specific subcluster on the blue t-SNE and cells expressing a particular transcriptomic marker on the grey t-SNE. The subclusters, indicated on the blue t-SNE, are obtained after subclustering of each major cell type separately and then retrospectively coloured on the blue t-SNE representing all cells. On the grey t-SNE all cells, irrespective of their subcluster classification, are coloured in red according to TM expression. One subcluster of capillary endothelial cells (EC\_CA4) was not shown as no specific TM was found for this subcluster.

# Fig. S7

## A

### Verhaak signatures applied to single cells

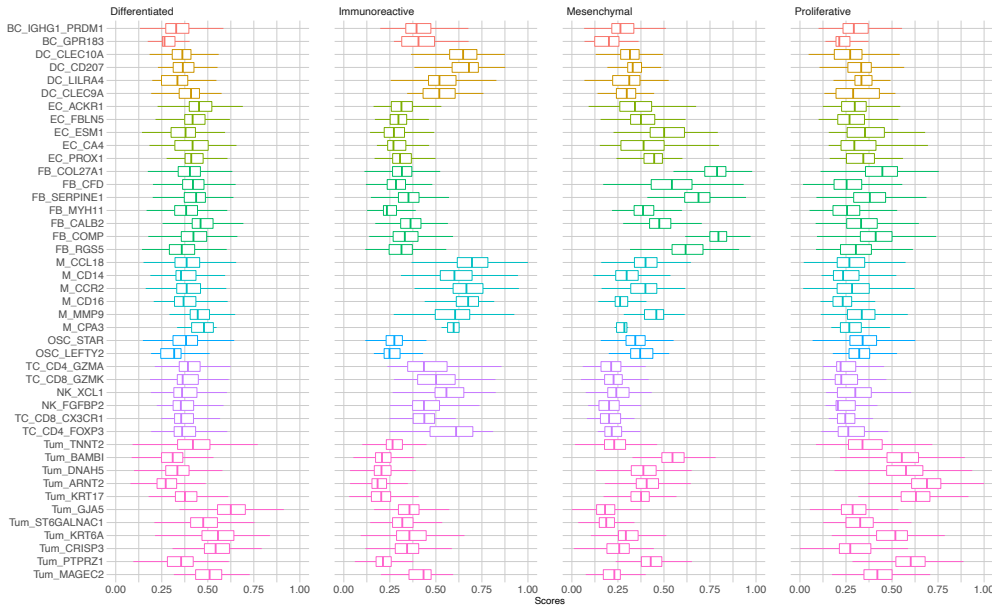

### Konecny signatures applied to single cells

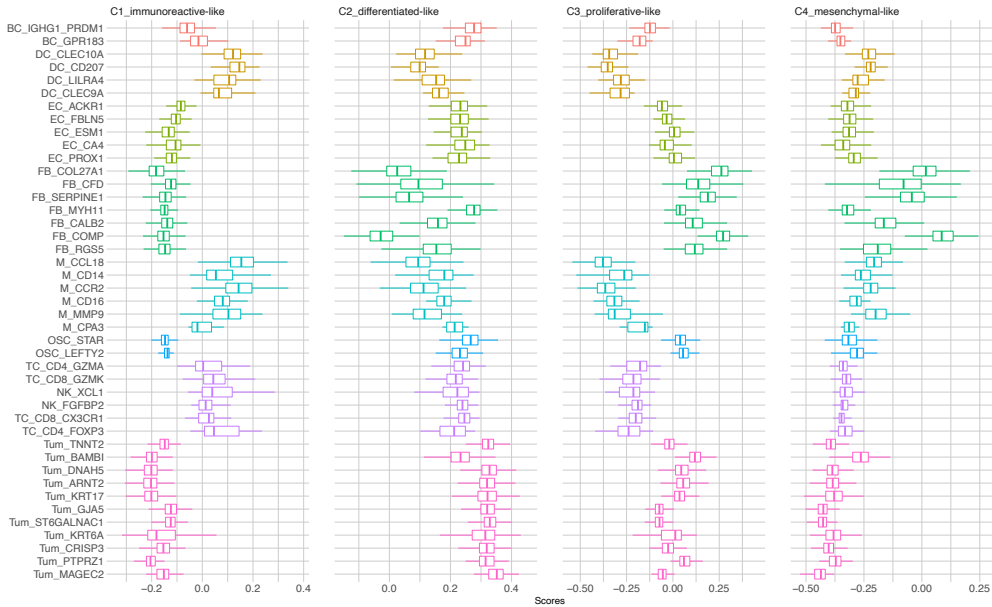

### Helland signatures applied to single cells

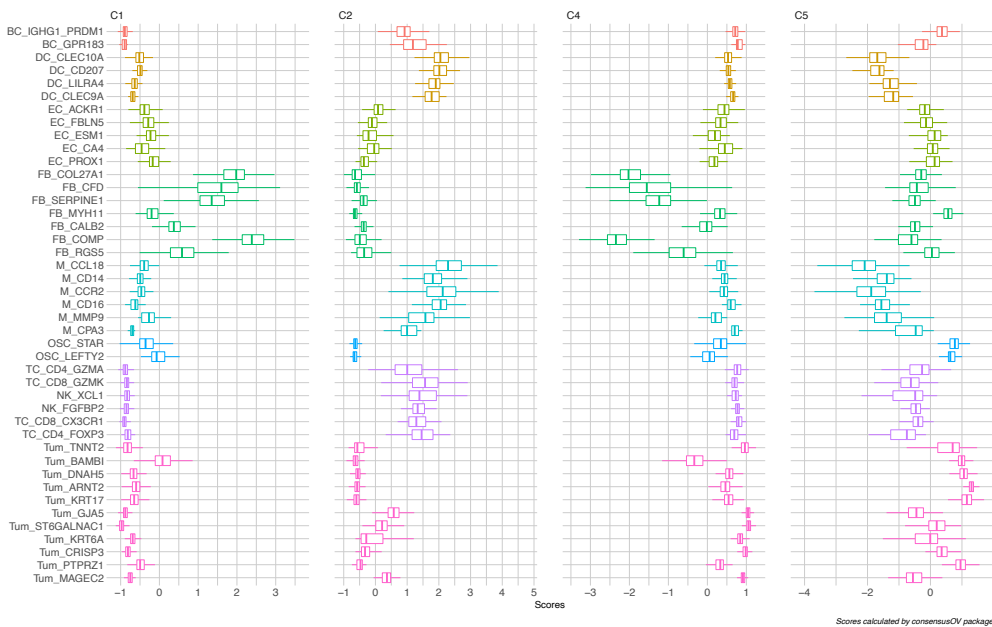

## B

### Molecular subtype labels assigned by Verhaak et al. and Chen et al. (ConsensusOV)

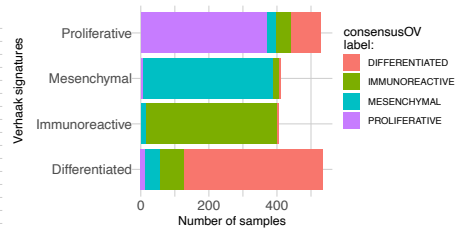

### Molecular subtype labels assigned by Konecny et al. and Chen et al. (ConsensusOV)

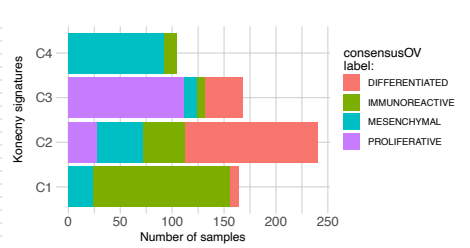

### Molecular subtype labels assigned by Helland et al. and Chen et al. (ConsensusOV)

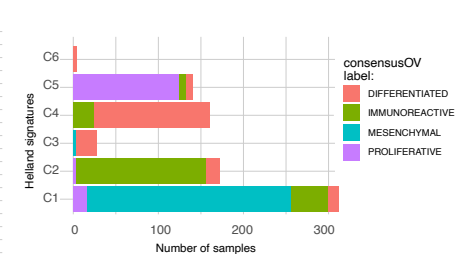

**Fig. S7| Molecular subtype scores of our 18,403 single cells using other algorithms. A,** All 18,403 single cells were scored individually for the presence of each molecular subtype signature using the other subtyping algorithms as described by Verhaak et al. (JCI 2013), Konecny et al. (JNCI 2014) and Helland et al. (Plos One 2011). **B,** Correlation between the molecular subtype annotation defined by the ConsensusOV signatures and Verhaak et al. (JCI 2013), Konecny et al. (JNCI 2014) and Helland et al. (Plos One 2011) respectively.
